# Supplementary material for: Predicting vaccine effectiveness in livestock populations: A theoretical framework applied to PRRS virus infections in pigs
Source: PubMed Central journal article supplement (PMC6716781; doi:10.1371/journal.pone.0220738), 2019-08-30
Supplement: pone.0220738.s001.pdf [file pone.0220738.s001.pdf]

## Supporting information

S1 Interactive modelling app: To determine vaccination strategies to maximise vaccine effectiveness in short and long-term, we developed a user-friendly, interactive modelling app based on our epidemiological model, to predict the epidemiological impact of vaccination with different types of vaccines under different vaccination strategies. The app was developed using R Shiny (R files attached) and it is accessible via this link: [https://vbitsouni.shinyapps.io/Prophylactic\\_mass\\_app/](https://vbitsouni.shinyapps.io/Prophylactic_mass_app/)

- (i) For the effect of different vaccine properties on the dynamics of the model:

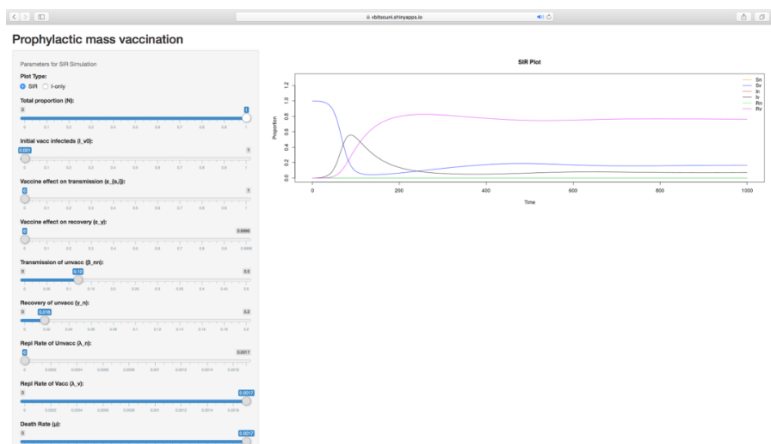

- (ii) For the effect of different vaccine properties on the infection dynamics:

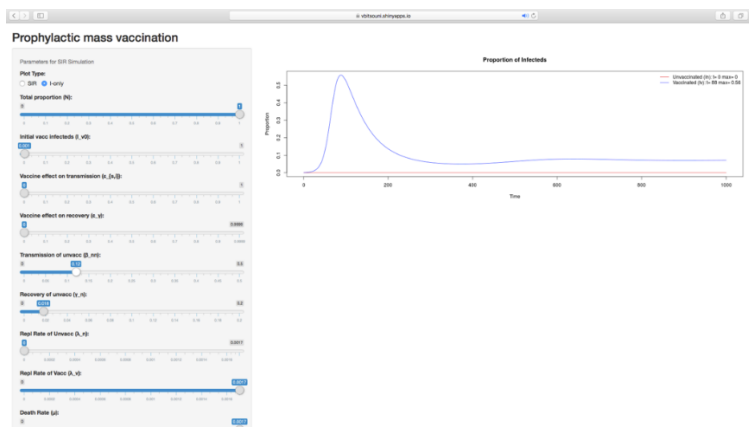

(Non-zero parameters in both screenshots: Initial prop. of vacc. infected animals ( $I_v(0)$ ) = 0.001, Initial prop. of vacc. susceptible animals ( $S_v(0)$ ) = 0.999, Vacc. coverage ( $p$ ) = 1, Transmission rate between unvacc. animals ( $\beta_{NN}$ ) = 0.12, Recovery rate of unvacc. animals ( $\gamma_N$ ) = 0.018, Replacement rate of vacc. animals ( $\lambda_v$ ) = 0.0017, Death rate ( $\mu$ ) = 0.0017, Death rate due to disease ( $d$ ) = 0.001.)

Further details of the model and the app can be found at this link: <https://www.wiki.ed.ac.uk/display/saphir/>, which is situated at the University of Edinburgh wiki-server, and outlines the components underlying vaccine effectiveness in the field, and their individual and interactive effects.
